# Supplementary material for: The study of antecedent clinical manifestations of hypertensive heart disease in cohort of hypertension
Source: publisher site journal article supplement (doi:10.18632/aging.204510), 2023-02-19
Supplement: Supplementary file [file aging-v15i6-204510-supplementary-material-SD1.pdf]

## SUPPLEMENTARY FIGURES

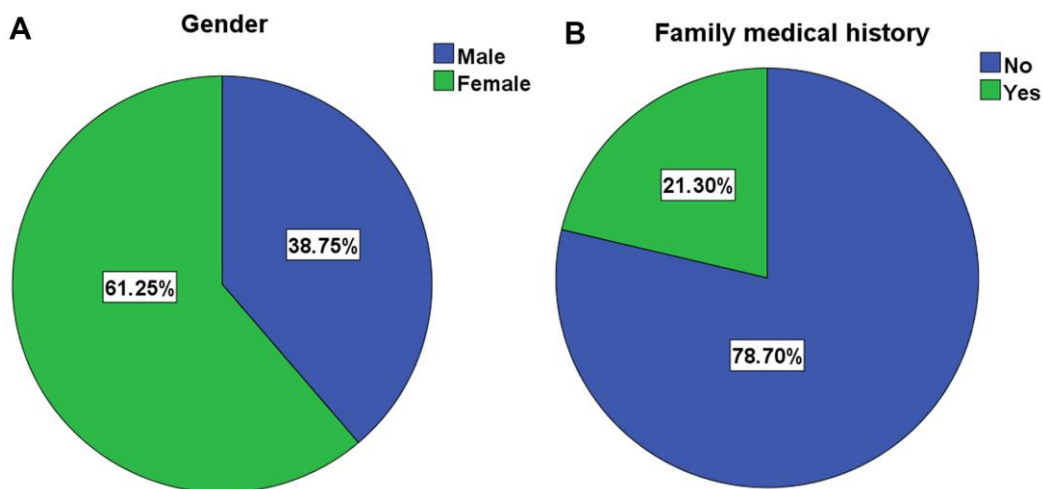

**Supplementary Figure 1. The distribution of hypertensive patients with different genders and family medical history.** (A) The frequencies of male or female patients in total hypertensive patients. (B) The frequencies of patients with or without familial inheritance of hypertension.

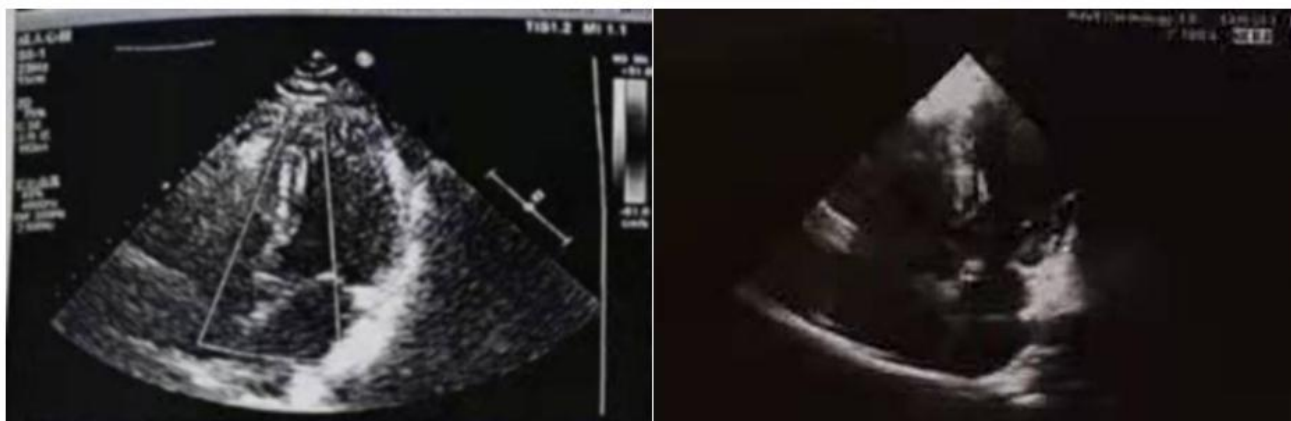

**Supplementary Figure 2. The representative echocardiogram images from hypertensive patients.** Left: diagnosis as no obvious abnormality of cardiac structure was found. Right: diagnosis as Pulmonary regurgitation (mild); Aortic regurgitation (mild); Left ventricular diastolic dysfunction; Extended aortic and decreased aortic elasticity.
