# Supplementary material for: The study of antecedent clinical manifestations of hypertensive heart disease in cohort of hypertension
Source: publisher site journal article supplement (doi:10.18632/aging.204510), 2023-02-19
Supplement: Supplementary file [file aging-v15i6-204510-supplementary-material-SD2.pdf]

## SUPPLEMENTARY TABLES

**Supplementary Table 1. The percentage of patients with palpitation.**

|       |        | Frequency | Percent | Valid percent | Cumulative percent |
|-------|--------|-----------|---------|---------------|--------------------|
| Valid | none   | 391       | 48.9    | 48.9          | 48.9               |
|       | slight | 371       | 46.4    | 46.4          | 95.3               |
|       | medium | 37        | 4.6     | 4.6           | 99.9               |
|       | severe | 1         | .1      | .1            | 100.0              |
|       | Total  | 800       | 100.0   | 100.0         |                    |

Note: “none” indicates no palpitation ever occurred with the patient; “slight” indicates less than 3 times palpitation occurred per day with the patient; “medium” indicates around 3-12 times palpitation occurred per day with the patient which doesn’t delay patient’s routine work; “severe” indicates palpitation occurred more than 12 times per day.

**Supplementary Table 2. The percentage of patients with angina.**

|       |        | Frequency | Percent | Valid percent | Cumulative percent |
|-------|--------|-----------|---------|---------------|--------------------|
| Valid | none   | 412       | 51.5    | 51.5          | 51.5               |
|       | slight | 371       | 46.4    | 46.4          | 97.9               |
|       | medium | 17        | 2.1     | 2.1           | 100.0              |
|       | Total  | 800       | 100.0   | 100.0         |                    |

Note: “none” indicates no angina ever occurred with the patient; “slight” indicates less than 3 times angina occurred per day with the patient; “medium” indicates around 3-12 times angina occurred per day with the patient which doesn’t delay patient’s routine work; “severe” indicates angina occurred more than 12 times per day with undermined living quality on patient.

**Supplementary Table 3A. The analysis of cross-classification by palpitation \* angina crosstabulation.**

|             |        | Angina |        |        | Total |
|-------------|--------|--------|--------|--------|-------|
|             |        | None   | Slight | Medium |       |
| Palpitation | none   | 312    | 79     | 0      | 391   |
|             | slight | 98     | 268    | 5      | 371   |
|             | medium | 2      | 23     | 12     | 37    |
|             | severe | 0      | 1      | 0      | 1     |
| Total       |        | 412    | 371    | 17     | 800   |

**Supplementary Table 3B. Chi-square tests for palpitation \* angina crosstabulation.**

|                              | Value                | df | Asymptotic significance (2-sided) |
|------------------------------|----------------------|----|-----------------------------------|
| Pearson Chi-Square           | 405.077 <sup>a</sup> | 6  | .000                              |
| Likelihood Ratio             | 315.512              | 6  | .000                              |
| Linear-by-Linear Association | 270.656              | 1  | .000                              |
| N of Valid Cases             | 800                  |    |                                   |

<sup>a</sup>4 cells (33.3%) have expected count less than 5. The minimum expected count is .02.

**Supplementary Table 4A. The frequencies of patients who is annoyed with no reason.**

|       |        | <b>Frequency</b> | <b>Percent</b> | <b>Valid percent</b> | <b>Cumulative percent</b> |
|-------|--------|------------------|----------------|----------------------|---------------------------|
| Valid | none   | 437              | 54.6           | 54.6                 | 54.6                      |
|       | slight | 338              | 42.3           | 42.3                 | 96.9                      |
|       | medium | 25               | 3.1            | 3.1                  | 100.0                     |
|       | Total  | 800              | 100.0          | 100.0                |                           |

**Supplementary Table 4B. The frequencies of patients with tendency to be irritable.**

|       |        | <b>Frequency</b> | <b>Percent</b> | <b>Valid percent</b> | <b>Cumulative percent</b> |
|-------|--------|------------------|----------------|----------------------|---------------------------|
| Valid | none   | 615              | 76.9           | 76.9                 | 76.9                      |
|       | slight | 166              | 20.8           | 20.8                 | 97.6                      |
|       | medium | 19               | 2.4            | 2.4                  | 100.0                     |
|       | Total  | 800              | 100.0          | 100.0                |                           |

**Supplementary Table 4C. The frequencies of patients with depression.**

|       |        | <b>Frequency</b> | <b>Percent</b> | <b>Valid percent</b> | <b>Cumulative percent</b> |
|-------|--------|------------------|----------------|----------------------|---------------------------|
| Valid | none   | 751              | 93.9           | 93.9                 | 93.9                      |
|       | slight | 46               | 5.8            | 5.8                  | 99.6                      |
|       | medium | 3                | .4             | .4                   | 100.0                     |
|       | Total  | 800              | 100.0          | 100.0                |                           |

**Supplementary Table 4D. The frequencies of patients with anxiety.**

|       |        | <b>Frequency</b> | <b>Percent</b> | <b>Valid percent</b> | <b>Cumulative percent</b> |
|-------|--------|------------------|----------------|----------------------|---------------------------|
| Valid | none   | 662              | 82.8           | 82.8                 | 82.8                      |
|       | slight | 125              | 15.6           | 15.6                 | 98.4                      |
|       | medium | 12               | 1.5            | 1.5                  | 99.9                      |
|       | severe | 1                | .1             | .1                   | 100.0                     |
|       | Total  | 800              | 100.0          | 100.0                |                           |

**Supplementary Table 4E. The frequencies of patients with fear.**

|       |        | <b>Frequency</b> | <b>Percent</b> | <b>Valid percent</b> | <b>Cumulative percent</b> |
|-------|--------|------------------|----------------|----------------------|---------------------------|
| Valid | none   | 747              | 93.4           | 93.4                 | 93.4                      |
|       | slight | 46               | 5.8            | 5.8                  | 99.1                      |
|       | medium | 7                | .9             | .9                   | 100.0                     |
|       | Total  | 800              | 100.0          | 100.0                |                           |

**Supplementary Table 4F. The frequencies of patients with amnesia.**

|         |        | <b>Frequency</b> | <b>Percent</b> | <b>Valid percent</b> | <b>Cumulative percent</b> |
|---------|--------|------------------|----------------|----------------------|---------------------------|
| Valid   | none   | 323              | 40.4           | 40.4                 | 40.4                      |
|         | slight | 398              | 49.8           | 49.8                 | 90.2                      |
|         | medium | 78               | 9.8            | 9.8                  | 100.0                     |
|         | Total  | 799              | 99.9           | 100.0                |                           |
| Missing | System | 1                | .1             |                      |                           |
| Total   |        | 800              | 100.0          |                      |                           |

**Supplementary Table 5A. The analysis of cross-classification of palpitation and annoyed mentality in patients with hypertension.**

|                    |        | <b>Annoy</b> |               |               | <b>Total</b> |
|--------------------|--------|--------------|---------------|---------------|--------------|
|                    |        | <b>None</b>  | <b>Slight</b> | <b>Medium</b> |              |
| <b>Palpitation</b> | none   | 287          | 104           | 0             | 391          |
|                    | slight | 138          | 219           | 14            | 371          |
|                    | medium | 12           | 14            | 11            | 37           |
|                    | severe | 0            | 1             | 0             | 1            |
| Total              |        | 437          | 338           | 25            | 800          |

**Supplementary Table 5B. Chi-square tests for analysis of cross-classification of palpitation and annoyed mentality in patients with hypertension.**

|                              | <b>Value</b>         | <b>df</b> | <b>Asymptotic significance (2-sided)</b> |
|------------------------------|----------------------|-----------|------------------------------------------|
| Pearson Chi-Square           | 194.656 <sup>a</sup> | 6         | .000                                     |
| Likelihood Ratio             | 154.725              | 6         | .000                                     |
| Linear-by-Linear Association | 126.564              | 1         | .000                                     |
| N of Valid Cases             | 800                  |           |                                          |

<sup>a</sup>4 cells (33.3%) have expected count less than 5. The minimum expected count is .03.

**Supplementary Table 5C. The analysis of cross-classification by palpitation \* amnesia crosstabulation.**

|                    |        | <b>Amnesia</b> |               |               | <b>Total</b> |
|--------------------|--------|----------------|---------------|---------------|--------------|
|                    |        | <b>None</b>    | <b>Slight</b> | <b>Medium</b> |              |
| <b>Palpitation</b> | none   | 192            | 172           | 26            | 390          |
|                    | slight | 124            | 210           | 37            | 371          |
|                    | medium | 7              | 15            | 15            | 37           |
|                    | severe | 0              | 1             | 0             | 1            |
| Total              |        | 323            | 398           | 78            | 799          |

**Supplementary Table 5D. Chi-square tests for palpitation \* amnesia crosstabulation.**

|                              | <b>Value</b>        | <b>df</b> | <b>Asymptotic significance (2-sided)</b> |
|------------------------------|---------------------|-----------|------------------------------------------|
| Pearson Chi-Square           | 63.596 <sup>a</sup> | 6         | .000                                     |
| Likelihood Ratio             | 49.347              | 6         | .000                                     |
| Linear-by-Linear Association | 38.971              | 1         | .000                                     |
| N of Valid Cases             | 799                 |           |                                          |

<sup>a</sup>4 cells (33.3%) have expected count less than 5. The minimum expected count is .10.

**Supplementary Table 6A. The frequencies of patients with backache.**

|       | <b>Frequency</b> | <b>Percent</b> | <b>Valid percent</b> | <b>Cumulative percent</b> |
|-------|------------------|----------------|----------------------|---------------------------|
| Valid | none             | 432            | 54.0                 | 54.0                      |
|       | slight           | 332            | 41.5                 | 95.5                      |
|       | medium           | 36             | 4.5                  | 100.0                     |
|       | Total            | 800            | 100.0                | 100.0                     |

**Supplementary Table 6B. The frequencies of patients with lumbar debility.**

|       | <b>Frequency</b> | <b>Percent</b> | <b>Valid percent</b> | <b>Cumulative percent</b> |
|-------|------------------|----------------|----------------------|---------------------------|
| Valid | none             | 342            | 42.8                 | 42.8                      |
|       | slight           | 393            | 49.1                 | 91.9                      |
|       | medium           | 65             | 8.1                  | 100.0                     |
|       | Total            | 800            | 100.0                | 100.0                     |

**Supplementary Table 6C. The frequencies of patients with numbness of limbs.**

|       | <b>Frequency</b> | <b>Percent</b> | <b>Valid percent</b> | <b>Cumulative percent</b> |
|-------|------------------|----------------|----------------------|---------------------------|
| Valid | none             | 432            | 54.0                 | 54.0                      |
|       | slight           | 329            | 41.1                 | 95.1                      |
|       | medium           | 36             | 4.5                  | 99.6                      |
|       | severe           | 3              | .4                   | 100.0                     |
|       | Total            | 800            | 100.0                | 100.0                     |

**Supplementary Table 7A. The analysis of cross-classification by palpitation \* backache crosstabulation in patients with hypertension.**

|                    |        | <b>Backache</b> |               |               | <b>Total</b> |
|--------------------|--------|-----------------|---------------|---------------|--------------|
|                    |        | <b>None</b>     | <b>Slight</b> | <b>Medium</b> |              |
| <b>Palpitation</b> | none   | 279             | 107           | 5             | 391          |
|                    | slight | 135             | 211           | 25            | 371          |
|                    | medium | 18              | 13            | 6             | 37           |
|                    | severe | 0               | 1             | 0             | 1            |
| <b>Total</b>       |        | 432             | 332           | 36            | 800          |

**Supplementary Table 7B. Chi-square tests for palpitation \* backache crosstabulation.**

|                              | Value                | df | Asymptotic significance (2-sided) |
|------------------------------|----------------------|----|-----------------------------------|
| Pearson Chi-Square           | 109.472 <sup>a</sup> | 6  | .000                              |
| Likelihood Ratio             | 109.468              | 6  | .000                              |
| Linear-by-Linear Association | 81.646               | 1  | .000                              |
| N of Valid Cases             | 800                  |    |                                   |

<sup>a</sup>4 cells (33.3%) have expected count less than 5. The minimum expected count is .05.

**Supplementary Table 7C. The analysis of cross-classification by palpitation \* lumbar debility crosstabulation in patients with hypertension.**

|             |        | Lumbar debility |        |        | Total |
|-------------|--------|-----------------|--------|--------|-------|
|             |        | None            | Slight | Medium |       |
| Palpitation | none   | 220             | 167    | 4      | 391   |
|             | slight | 108             | 212    | 51     | 371   |
|             | medium | 14              | 13     | 10     | 37    |
|             | severe | 0               | 1      | 0      | 1     |
| Total       |        | 342             | 393    | 65     | 800   |

**Supplementary Table 7D. Chi-square tests for palpitation \* lumbar debility crosstabulation.**

|                              | Value               | df | Asymptotic significance (2-sided) |
|------------------------------|---------------------|----|-----------------------------------|
| Pearson Chi-Square           | 98.674 <sup>a</sup> | 6  | .000                              |
| Likelihood Ratio             | 105.634             | 6  | .000                              |
| Linear-by-Linear Association | 75.273              | 1  | .000                              |
| N of Valid Cases             | 800                 |    |                                   |

<sup>a</sup>4 cells (33.3%) have expected count less than 5. The minimum expected count is .08.

**Supplementary Table 7E. The analysis of cross-classification by palpitation \* numbness of limbs crosstabulation in patients with hypertension.**

|             |        | Numbness of limbs |        |        |        | Total |
|-------------|--------|-------------------|--------|--------|--------|-------|
|             |        | None              | Slight | Medium | Severe |       |
| Palpitation | none   | 267               | 117    | 7      | 0      | 391   |
|             | slight | 161               | 191    | 17     | 2      | 371   |
|             | medium | 4                 | 20     | 12     | 1      | 37    |
|             | severe | 0                 | 1      | 0      | 0      | 1     |
| Total       |        | 432               | 329    | 36     | 3      | 800   |

**Supplementary Table 7F. Chi-square tests for palpitation \* numbness of limbs crosstabulation.**

|                              | Value                | df | Asymptotic significance (2-sided) |
|------------------------------|----------------------|----|-----------------------------------|
| Pearson Chi-Square           | 137.443 <sup>a</sup> | 9  | .000                              |
| Likelihood Ratio             | 106.711              | 9  | .000                              |
| Linear-by-Linear Association | 96.307               | 1  | .000                              |
| N of Valid Cases             | 800                  |    |                                   |

<sup>a</sup>8 cells (50.0%) have expected count less than 5. The minimum expected count is .00.

**Supplementary Table 8A. The frequencies of patients with dizzy.**

|       |        | Frequency | Percent | Valid percent | Cumulative percent |
|-------|--------|-----------|---------|---------------|--------------------|
| Valid | None   | 315       | 39.4    | 39.4          | 39.4               |
|       | slight | 447       | 55.9    | 55.9          | 95.3               |
|       | medium | 38        | 4.8     | 4.8           | 100.0              |
|       | Total  | 800       | 100.0   | 100.0         |                    |

**Supplementary Table 8B. The frequencies of patients being dazed.**

|       |        | Frequency | Percent | Valid percent | Cumulative percent |
|-------|--------|-----------|---------|---------------|--------------------|
| Valid | None   | 409       | 51.1    | 51.1          | 51.1               |
|       | Slight | 352       | 44.0    | 44.0          | 95.1               |
|       | Medium | 39        | 4.9     | 4.9           | 100.0              |
|       | Total  | 800       | 100.0   | 100.0         |                    |

**Supplementary Table 8C. The frequencies of patients with headache.**

|       |        | Frequency | Percent | Valid percent | Cumulative percent |
|-------|--------|-----------|---------|---------------|--------------------|
| Valid | none   | 409       | 51.1    | 51.1          | 51.1               |
|       | slight | 357       | 44.6    | 44.6          | 95.8               |
|       | medium | 33        | 4.1     | 4.1           | 99.9               |
|       | severe | 1         | .1      | .1            | 100.0              |
|       | Total  | 800       | 100.0   | 100.0         |                    |

**Supplementary Table 8D. The frequencies of patients with tinnitus.**

|       |        | Frequency | Percent | Valid percent | Cumulative percent |
|-------|--------|-----------|---------|---------------|--------------------|
| Valid | None   | 331       | 41.4    | 41.4          | 41.4               |
|       | Slight | 442       | 55.3    | 55.3          | 96.6               |
|       | Medium | 27        | 3.4     | 3.4           | 100.0              |
|       | Total  | 800       | 100.0   | 100.0         |                    |

**Supplementary Table 9A. The analysis of cross-classification by palpitation \* dizzy crosstabulation in patients with hypertension.**

|             |        | Dizzy |        |        | Total |
|-------------|--------|-------|--------|--------|-------|
|             |        | None  | Slight | Medium |       |
| Palpitation | none   | 237   | 145    | 9      | 391   |
|             | slight | 76    | 277    | 18     | 371   |
|             | medium | 2     | 24     | 11     | 37    |
|             | severe | 0     | 1      | 0      | 1     |
| Total       |        | 315   | 447    | 38     | 800   |

**Supplementary Table 9B. Chi-square tests for palpitation \* dizzy crosstabulation.**

|                              | <b>Value</b>         | <b>df</b> | <b>Asymptotic significance (2-sided)</b> |
|------------------------------|----------------------|-----------|------------------------------------------|
| Pearson Chi-Square           | 192.276 <sup>a</sup> | 6         | .000                                     |
| Likelihood Ratio             | 175.322              | 6         | .000                                     |
| Linear-by-Linear Association | 148.627              | 1         | .000                                     |
| N of Valid Cases             | 800                  |           |                                          |

<sup>a</sup>4 cells (33.3%) have expected count less than 5. The minimum expected count is .05.

**Supplementary Table 9C. The analysis of cross-classification by palpitation \* dazed crosstabulation in patients with hypertension.**

|                    |        | <b>Dazed</b> |               |               | <b>Total</b> |
|--------------------|--------|--------------|---------------|---------------|--------------|
|                    |        | <b>None</b>  | <b>Slight</b> | <b>Medium</b> |              |
| <b>Palpitation</b> | none   | 254          | 132           | 5             | 391          |
|                    | slight | 139          | 207           | 25            | 371          |
|                    | medium | 16           | 12            | 9             | 37           |
|                    | severe | 0            | 1             | 0             | 1            |
| <b>Total</b>       |        | 409          | 352           | 39            | 800          |

**Supplementary Table 9D. Chi-square tests for palpitation \* dazed crosstabulation.**

|                              | <b>Value</b>        | <b>df</b> | <b>Asymptotic significance (2-sided)</b> |
|------------------------------|---------------------|-----------|------------------------------------------|
| Pearson Chi-Square           | 93.803 <sup>a</sup> | 6         | .000                                     |
| Likelihood Ratio             | 84.350              | 6         | .000                                     |
| Linear-by-Linear Association | 65.320              | 1         | .000                                     |
| N of Valid Cases             | 800                 |           |                                          |

<sup>a</sup>4 cells (33.3%) have expected count less than 5. The minimum expected count is .05.

**Supplementary Table 9E. The analysis of cross-classification by palpitation \* headache crosstabulation in patients with hypertension.**

|                    |        | <b>Headache</b> |               |               |               | <b>Total</b> |
|--------------------|--------|-----------------|---------------|---------------|---------------|--------------|
|                    |        | <b>None</b>     | <b>Slight</b> | <b>Medium</b> | <b>Severe</b> |              |
| <b>Palpitation</b> | none   | 284             | 102           | 5             | 0             | 391          |
|                    | slight | 112             | 236           | 22            | 1             | 371          |
|                    | medium | 13              | 18            | 6             | 0             | 37           |
|                    | severe | 0               | 1             | 0             | 0             | 1            |
| <b>Total</b>       |        | 409             | 357           | 33            | 1             | 800          |

**Supplementary Table 9F. Chi-square tests for palpitation \* headache crosstabulation.**

|                              | Value                | df | Asymptotic significance (2-sided) |
|------------------------------|----------------------|----|-----------------------------------|
| Pearson Chi-Square           | 155.376 <sup>a</sup> | 9  | .000                              |
| Likelihood Ratio             | 156.455              | 9  | .000                              |
| Linear-by-Linear Association | 122.742              | 1  | .000                              |
| N of Valid Cases             | 800                  |    |                                   |

<sup>a</sup>8 cells (50.0%) have expected count less than 5. The minimum expected count is .00.

**Supplementary Table 9G. The analysis of cross-classification by palpitation \* tinnitus crosstabulation in patients with hypertension.**

|                    |        | Tinnitus |        |        | Total |
|--------------------|--------|----------|--------|--------|-------|
|                    |        | None     | Slight | Medium |       |
| <b>Palpitation</b> | none   | 211      | 179    | 1      | 391   |
|                    | slight | 108      | 246    | 17     | 371   |
|                    | medium | 12       | 16     | 9      | 37    |
|                    | severe | 0        | 1      | 0      | 1     |
| <b>Total</b>       |        | 331      | 442    | 27     | 800   |

**Supplementary Table 9H. Chi-square tests for palpitation \* tinnitus crosstabulation.**

|                              | Value                | df | Asymptotic significance (2-sided) |
|------------------------------|----------------------|----|-----------------------------------|
| Pearson Chi-Square           | 106.500 <sup>a</sup> | 6  | .000                              |
| Likelihood Ratio             | 86.896               | 6  | .000                              |
| Linear-by-Linear Association | 63.782               | 1  | .000                              |
| N of Valid Cases             | 800                  |    |                                   |

<sup>a</sup>4 cells (33.3%) have expected count less than 5. The minimum expected count is .03.

**Supplementary Table 10. Descriptive statistics of blood routine index.**

|                                            | N   | Minimum | Maximum | Mean    | Std. deviation |
|--------------------------------------------|-----|---------|---------|---------|----------------|
| Homocysteine (µM)                          | 800 | .65     | 72.80   | 12.7811 | 7.39702        |
| Triglyceride (mM)                          | 800 | .00     | 36.00   | 2.0748  | 2.03663        |
| Total cholesterol (mM)                     | 800 | .42     | 30.93   | 4.68563 | 1.906583       |
| Low density lipoprotein (mM)               | 799 | .98     | 6.55    | 2.9852  | .83837         |
| High density lipoprotein (mM)              | 800 | .52     | 11.68   | 1.8905  | 1.52829        |
| Fasting blood glucose (mM)                 | 799 | 2.68    | 70.19   | 6.4389  | 4.51333        |
| Creatinine (µM)                            | 800 | 30.0    | 694.2   | 74.423  | 40.0658        |
| Urea nitrogen (mM)                         | 800 | 2.16    | 469.00  | 43.0038 | 102.07597      |
| Uric acid (µM)                             | 800 | 3.5     | 766.3   | 290.880 | 137.5726       |
| High sensitivity C reactive protein (mg/L) | 799 | .2      | 17.3    | 2.953   | 2.9505         |
| Valid N (listwise)                         | 797 |         |         |         |                |

**Supplementary Table 11A. Correlations of grade of palpitation and homocysteine value in patients with hypertension.**

|                |                     | <b>Palpitation</b>      | <b>Homocysteine</b> |
|----------------|---------------------|-------------------------|---------------------|
| Spearman's rho | <b>Palpitation</b>  | Correlation Coefficient | 1.000               |
|                |                     | Sig. (2-tailed)         | .257**              |
|                |                     | N                       | 800                 |
|                | <b>Homocysteine</b> | Correlation Coefficient | .257**              |
|                |                     | Sig. (2-tailed)         | 1.000               |
|                |                     | N                       | 800                 |

\*\*Correlation is significant at the 0.01 level (2-tailed).

**Supplementary Table 11B. Correlations of grade of palpitation and total cholesterol value in patients with hypertension correlations.**

|                |                          | <b>Palpitation</b>      | <b>Total cholesterol</b> |
|----------------|--------------------------|-------------------------|--------------------------|
| Spearman's rho | <b>Palpitation</b>       | Correlation Coefficient | 1.000                    |
|                |                          | Sig. (2-tailed)         | .178**                   |
|                |                          | N                       | 800                      |
|                | <b>Total cholesterol</b> | Correlation Coefficient | .178**                   |
|                |                          | Sig. (2-tailed)         | 1.000                    |
|                |                          | N                       | 800                      |

\*\*Correlation is significant at the 0.01 level (2-tailed).

**Supplementary Table 11C. Correlations of grade of palpitation and creatinine value in patients with hypertension correlations.**

|                |                    | <b>Palpitation</b>      | <b>Creatinine</b> |
|----------------|--------------------|-------------------------|-------------------|
| Spearman's rho | <b>Palpitation</b> | Correlation Coefficient | 1.000             |
|                |                    | Sig. (2-tailed)         | .087*             |
|                |                    | N                       | 800               |
|                | <b>Creatinine</b>  | Correlation Coefficient | .087*             |
|                |                    | Sig. (2-tailed)         | 1.000             |
|                |                    | N                       | 800               |

\*Correlation is significant at the 0.05 level (2-tailed).

**Supplementary Table 11D. Correlations of grade of palpitation and uric acid value in patients with hypertension correlations.**

|                |                    | <b>Palpitation</b>      | <b>Uric acid</b> |
|----------------|--------------------|-------------------------|------------------|
| Spearman's rho | <b>Palpitation</b> | Correlation Coefficient | 1.000            |
|                |                    | Sig. (2-tailed)         | .203**           |
|                |                    | N                       | 800              |
|                | <b>Uric acid</b>   | Correlation Coefficient | .203**           |
|                |                    | Sig. (2-tailed)         | 1.000            |
|                |                    | N                       | 800              |

\*\*Correlation is significant at the 0.01 level (2-tailed).

**Supplementary Table 11E. Correlations of grade of palpitation and triglyceride value in patients with hypertension correlations.**

|                |                     |                         | <b>Palpitation</b> | <b>Triglyceride</b> |
|----------------|---------------------|-------------------------|--------------------|---------------------|
| Spearman's rho | <b>Palpitation</b>  | Correlation Coefficient | 1.000              | -.224**             |
|                |                     | Sig. (2-tailed)         | .                  | .000                |
|                |                     | N                       | 800                | 800                 |
|                | <b>Triglyceride</b> | Correlation Coefficient | -.224**            | 1.000               |
|                |                     | Sig. (2-tailed)         | .000               | .                   |
|                |                     | N                       | 800                | 800                 |

\*\*Correlation is significant at the 0.01 level (2-tailed).

**Supplementary Table 11F. Correlations of grade of palpitation and high-density lipoprotein value in patients with hypertension Correlations.**

|                |                                 |                         | <b>Palpitation</b> | <b>High density lipoprotein</b> |
|----------------|---------------------------------|-------------------------|--------------------|---------------------------------|
| Spearman's rho | <b>Palpitation</b>              | Correlation Coefficient | 1.000              | -.156**                         |
|                |                                 | Sig. (2-tailed)         | .                  | .000                            |
|                |                                 | N                       | 800                | 800                             |
|                | <b>High density lipoprotein</b> | Correlation Coefficient | -.156**            | 1.000                           |
|                |                                 | Sig. (2-tailed)         | .000               | .                               |
|                |                                 | N                       | 800                | 800                             |

\*\*Correlation is significant at the 0.01 level (2-tailed).

**Supplementary Table 12. Gender.**

|       |        | <b>Frequency</b> | <b>Percent</b> | <b>Valid percent</b> | <b>Cumulative percent</b> |
|-------|--------|------------------|----------------|----------------------|---------------------------|
| Valid | Male   | 310              | 38.8           | 38.8                 | 38.8                      |
|       | Female | 490              | 61.3           | 61.3                 | 100.0                     |
|       | Total  | 800              | 100.0          | 100.0                |                           |

**Supplementary Table 13. Family medical history.**

|         |        | <b>Frequency</b> | <b>Percent</b> | <b>Valid percent</b> | <b>Cumulative percent</b> |
|---------|--------|------------------|----------------|----------------------|---------------------------|
| Valid   | No     | 628              | 78.5           | 78.7                 | 78.7                      |
|         | Yes    | 170              | 21.3           | 21.3                 | 100.0                     |
|         | Total  | 798              | 99.8           | 100.0                |                           |
| Missing | System | 2                | .3             |                      |                           |
| Total   |        | 800              | 100.0          |                      |                           |

**Supplementary Table 14A. The analysis of cross-classification by palpitation \* Age crosstabulation in patients with hypertension.**

|            |       | Palpitation |        |        |        | Total |
|------------|-------|-------------|--------|--------|--------|-------|
|            |       | None        | Slight | Medium | Severe |       |
| Age Grades | 40-49 | 10          | 6      | 0      | 0      | 16    |
|            | 50-59 | 5           | 0      | 0      | 0      | 5     |
|            | 60-69 | 165         | 135    | 6      | 0      | 306   |
|            | >69   | 211         | 230    | 31     | 1      | 473   |
| Total      |       | 391         | 371    | 37     | 1      | 800   |

**Supplementary Table 14B. Chi-square tests for palpitation \* age crosstabulation.**

|                              | Value               | df | Asymptotic significance (2-sided) |
|------------------------------|---------------------|----|-----------------------------------|
| Pearson Chi-Square           | 20.245 <sup>a</sup> | 9  | .016                              |
| Likelihood Ratio             | 24.106              | 9  | .004                              |
| Linear-by-Linear Association | 14.290              | 1  | .000                              |
| N of Valid Cases             | 800                 |    |                                   |

<sup>a</sup>8 cells (50.0%) have expected count less than 5. The minimum expected count is .01.

**Supplementary Table 14C. The analysis of cross-classification by angina \* age crosstabulation in patients with hypertension.**

|            |       | Angina |        |        | Total |
|------------|-------|--------|--------|--------|-------|
|            |       | None   | Slight | Medium |       |
| Age Grades | 40-49 | 12     | 4      | 0      | 16    |
|            | 50-59 | 4      | 1      | 0      | 5     |
|            | 60-69 | 238    | 63     | 5      | 306   |
|            | >69   | 352    | 119    | 2      | 473   |
| Total      |       | 606    | 187    | 7      | 800   |

**Supplementary Table 14D. Chi-square tests for angina \* age crosstabulation.**

|                              | Value              | df | Asymptotic significance (2-sided) |
|------------------------------|--------------------|----|-----------------------------------|
| Pearson Chi-Square           | 5.296 <sup>a</sup> | 6  | .506                              |
| Likelihood Ratio             | 5.356              | 6  | .499                              |
| Linear-by-Linear Association | .317               | 1  | .574                              |
| N of Valid Cases             | 800                |    |                                   |

<sup>a</sup>7 cells (58.3%) have expected count less than 5. The minimum expected count is .04.

**Supplementary Table 14E. The analysis of cross-classification by amnesia \* age crosstabulation in patients with hypertension.**

|            |       | Amnesia |        |        | Total |
|------------|-------|---------|--------|--------|-------|
|            |       | None    | Slight | Medium |       |
| Age Grades | 40-49 | 5       | 9      | 2      | 16    |
|            | 50-59 | 4       | 1      | 0      | 5     |
|            | 60-69 | 129     | 153    | 24     | 306   |
|            | >69   | 185     | 235    | 52     | 472   |
| Total      |       | 323     | 398    | 78     | 799   |

**Supplementary Table 14F. Chi-square tests for amnesia \* age crosstabulation.**

|                              | Value              | df | Asymptotic significance (2-sided) |
|------------------------------|--------------------|----|-----------------------------------|
| Pearson Chi-Square           | 6.228 <sup>a</sup> | 6  | .398                              |
| Likelihood Ratio             | 6.611              | 6  | .358                              |
| Linear-by-Linear Association | .868               | 1  | .351                              |
| N of Valid Cases             | 799                |    |                                   |

<sup>a</sup>4 cells (33.3%) have expected count less than 5. The minimum expected count is .49.

**Supplementary Table 14G. The analysis of cross-classification by annoy \* age crosstabulation in patients with hypertension.**

|            |       | Annoy |        |        | Total |
|------------|-------|-------|--------|--------|-------|
|            |       | None  | Slight | Medium |       |
| Age Grades | 40-49 | 12    | 3      | 1      | 16    |
|            | 50-59 | 4     | 1      | 0      | 5     |
|            | 60-69 | 167   | 131    | 8      | 306   |
|            | >69   | 254   | 203    | 16     | 473   |
| Total      |       | 437   | 338    | 25     | 800   |

**Supplementary Table 14H. Chi-square tests for annoy \* age crosstabulation.**

|                              | Value              | df | Asymptotic significance (2-sided) |
|------------------------------|--------------------|----|-----------------------------------|
| Pearson Chi-Square           | 5.642 <sup>a</sup> | 6  | .465                              |
| Likelihood Ratio             | 6.192              | 6  | .402                              |
| Linear-by-Linear Association | 1.652              | 1  | .199                              |
| N of Valid Cases             | 800                |    |                                   |

<sup>a</sup>4 cells (33.3%) have expected count less than 5. The minimum expected count is .16.

**Supplementary Table 14I. The analysis of cross-classification by numbness of limbs \* age crosstabulation in patients with hypertension.**

|            |       | Numbness of limbs |        |        |        | Total |
|------------|-------|-------------------|--------|--------|--------|-------|
|            |       | None              | Slight | Medium | Severe |       |
| Age Grades | 40-49 | 13                | 3      | 0      | 0      | 16    |
|            | 50-59 | 3                 | 2      | 0      | 0      | 5     |
|            | 60-69 | 184               | 116    | 6      | 0      | 306   |
|            | >69   | 232               | 208    | 30     | 3      | 473   |
| Total      |       | 432               | 329    | 36     | 3      | 800   |

**Supplementary Table 14J. Chi-square tests for numbness of limbs \* age crosstabulation.**

|                              | Value               | df | Asymptotic significance (2-sided) |
|------------------------------|---------------------|----|-----------------------------------|
| Pearson Chi-Square           | 21.136 <sup>a</sup> | 9  | .012                              |
| Likelihood Ratio             | 24.133              | 9  | .004                              |
| Linear-by-Linear Association | 18.789              | 1  | .000                              |
| N of Valid Cases             | 800                 |    |                                   |

<sup>a</sup>8 cells (50.0%) have expected count less than 5. The minimum expected count is .02.

**Supplementary Table 14K. The analysis of cross-classification by lumbar debility \* age crosstabulation in patients with hypertension.**

|            |       | Debility of lumbar |        |        | Total |
|------------|-------|--------------------|--------|--------|-------|
|            |       | None               | Slight | Medium |       |
| Age Grades | 40-49 | 5                  | 10     | 1      | 16    |
|            | 50-59 | 3                  | 2      | 0      | 5     |
|            | 60-69 | 153                | 125    | 28     | 306   |
|            | >69   | 181                | 256    | 36     | 473   |
| Total      |       | 342                | 393    | 65     | 800   |

**Supplementary Table 14L. Chi-square tests for lumbar debility \* age crosstabulation.**

|                              | Value               | df | Asymptotic significance (2-sided) |
|------------------------------|---------------------|----|-----------------------------------|
| Pearson Chi-Square           | 15.193 <sup>a</sup> | 6  | .019                              |
| Likelihood Ratio             | 15.634              | 6  | .016                              |
| Linear-by-Linear Association | 2.429               | 1  | .119                              |
| N of Valid Cases             | 800                 |    |                                   |

<sup>a</sup>4 cells (33.3%) have expected count less than 5. The minimum expected count is .41.

**Supplementary Table 14M. The analysis of cross-classification by backache \* age crosstabulation in patients with hypertension.**

|            |       | Backache |        |        | Total |
|------------|-------|----------|--------|--------|-------|
|            |       | None     | Slight | Medium |       |
| Age Grades | 40-49 | 14       | 1      | 1      | 16    |
|            | 50-59 | 1        | 4      | 0      | 5     |
|            | 60-69 | 165      | 122    | 19     | 306   |
|            | >69   | 252      | 205    | 16     | 473   |
| Total      |       | 432      | 332    | 36     | 800   |

**Supplementary Table 14N. Chi-square tests for backache \* age crosstabulation.**

|                              | Value               | df | Asymptotic significance (2-sided) |
|------------------------------|---------------------|----|-----------------------------------|
| Pearson Chi-Square           | 15.233 <sup>a</sup> | 6  | .019                              |
| Likelihood Ratio             | 17.486              | 6  | .008                              |
| Linear-by-Linear Association | .449                | 1  | .503                              |
| N of Valid Cases             | 800                 |    |                                   |

<sup>a</sup>4 cells (33.3%) have expected count less than 5. The minimum expected count is .22.

**Supplementary Table 14O. The analysis of cross-classification by dizzy \* age crosstabulation in patients with hypertension.**

|            |       | Dizzy |        |        | Total |
|------------|-------|-------|--------|--------|-------|
|            |       | None  | Slight | Medium |       |
| Age Grades | 40-49 | 9     | 6      | 1      | 16    |
|            | 50-59 | 2     | 3      | 0      | 5     |
|            | 60-69 | 138   | 158    | 10     | 306   |
|            | >69   | 166   | 280    | 27     | 473   |
| Total      |       | 315   | 447    | 38     | 800   |

**Supplementary Table 14P. Chi-square tests for dizzy \* age crosstabulation.**

|                              | Value               | df | Asymptotic significance (2-sided) |
|------------------------------|---------------------|----|-----------------------------------|
| Pearson Chi-Square           | 11.447 <sup>a</sup> | 6  | .076                              |
| Likelihood Ratio             | 11.765              | 6  | .067                              |
| Linear-by-Linear Association | 9.168               | 1  | .002                              |
| N of Valid Cases             | 800                 |    |                                   |

<sup>a</sup>4 cells (33.3%) have expected count less than 5. The minimum expected count is .24.

**Supplementary Table 14Q. The analysis of cross-classification by dazed \* age crossstabulation in patients with hypertension.**

|            |       | Dazed |        |        | Total |
|------------|-------|-------|--------|--------|-------|
|            |       | None  | Slight | Medium |       |
| Age Grades | 40-49 | 13    | 3      | 0      | 16    |
|            | 50-59 | 3     | 2      | 0      | 5     |
|            | 60-69 | 179   | 116    | 11     | 306   |
|            | >69   | 214   | 231    | 28     | 473   |
| Total      |       | 409   | 352    | 39     | 800   |

**Supplementary Table 14R. Chi-square tests for dazed \* age crossstabulation.**

|                              | Value               | df | Asymptotic significance (2-sided) |
|------------------------------|---------------------|----|-----------------------------------|
| Pearson Chi-Square           | 19.914 <sup>a</sup> | 6  | .003                              |
| Likelihood Ratio             | 21.204              | 6  | .002                              |
| Linear-by-Linear Association | 18.901              | 1  | .000                              |
| N of Valid Cases             | 800                 |    |                                   |

<sup>a</sup>4 cells (33.3%) have expected count less than 5. The minimum expected count is .24.

**Supplementary Table 14S. The analysis of cross-classification by headache \* age crossstabulation in patients with hypertension.**

|            |       | Headache |        |        |        | Total |
|------------|-------|----------|--------|--------|--------|-------|
|            |       | None     | Slight | Medium | Severe |       |
| Age Grades | 40-49 | 12       | 3      | 1      | 0      | 16    |
|            | 50-59 | 5        | 0      | 0      | 0      | 5     |
|            | 60-69 | 169      | 131    | 5      | 1      | 306   |
|            | >69   | 223      | 223    | 27     | 0      | 473   |
| Total      |       | 409      | 357    | 33     | 1      | 800   |

**Supplementary Table 14T. Chi-square tests for headache \* age crossstabulation.**

|                              | Value               | df | Asymptotic significance (2-sided) |
|------------------------------|---------------------|----|-----------------------------------|
| Pearson Chi-Square           | 21.597 <sup>a</sup> | 9  | .010                              |
| Likelihood Ratio             | 25.329              | 9  | .003                              |
| Linear-by-Linear Association | 11.744              | 1  | .001                              |
| N of Valid Cases             | 800                 |    |                                   |

<sup>a</sup>8 cells (50.0%) have expected count less than 5. The minimum expected count is .01.

**Supplementary Table 14U. The analysis of cross-classification by Tinnitus \* age crosstabulation in patients with hypertension.**

|            |       | Tinnitus |        |        | Total |
|------------|-------|----------|--------|--------|-------|
|            |       | None     | Slight | Medium |       |
| Age Grades | 40-49 | 14       | 2      | 0      | 16    |
|            | 50-59 | 3        | 2      | 0      | 5     |
|            | 60-69 | 143      | 155    | 8      | 306   |
|            | >69   | 171      | 283    | 19     | 473   |
| Total      |       | 331      | 442    | 27     | 800   |

**Supplementary Table 14V. Chi-square tests for tinnitus \* age crosstabulation.**

|                              | Value               | df | Asymptotic significance (2-sided) |
|------------------------------|---------------------|----|-----------------------------------|
| Pearson Chi-Square           | 24.168 <sup>a</sup> | 6  | .000                              |
| Likelihood Ratio             | 25.325              | 6  | .000                              |
| Linear-by-Linear Association | 21.611              | 1  | .000                              |
| N of Valid Cases             | 800                 |    |                                   |

<sup>a</sup>4 cells (33.3%) have expected count less than 5. The minimum expected count is .17.
